# Supplementary material
Source: ML conference proceedings conference paper supplement (https://proceedings.neurips.cc/paper_files/paper/2012/hash/a1140a3d0df1c81e24ae954d935e8926-Abstract.html)
Supplement: Supplementary file [file a1140a3d0df1c81e24ae954d935e8926-Supplemental.zip]

---

# Supplement – From Deformations to Parts: Motion-based Segmentation of 3D Objects

---

Soumya Ghosh<sup>1</sup>, Erik B. Sudderth<sup>1</sup>, Matthew Loper<sup>2</sup>, and Michael J. Black<sup>2</sup>

<sup>1</sup>Department of Computer Science, Brown University, {sghosh, sudderth}@cs.brown.edu

<sup>2</sup>Perceiving Systems Department, Max Planck Institute for Intelligent Systems,  
{mloper, black}@tuebingen.mpg.de

## 1 Likelihood derivation

Here, we will denote  $Y_{jk}$  and  $X_{b_jk}$  simply as  $Y$  and  $X$ .

$$Y|X \sim \mathcal{MN}(AX, \Sigma, \mathbf{I}) \quad (1)$$

It can be shown that [1]

$$p(Y|X, \Sigma) = \int p(Y, A|X, \Sigma) dA = \frac{|K|^{3/2}}{(2\pi)^{3N/2} |\Sigma|^{N/2} |S_{xx}|^{3/2}} \exp\left\{-\frac{1}{2} \text{tr}(\Sigma^{-1} S_{y|x})\right\} \quad (2)$$

and

$$S_{xx} = XX^T + K \quad (3)$$

$$S_{yx} = YX^T + MK \quad (4)$$

$$S_{y|x} = YY^T + MKM^T - S_{yx}(S_{xx})^{-1}S_{yx}^T \quad (5)$$

Finally, the marginal likelihood is given by

$$p(Y|X) = \int p(Y|X, \Sigma) p(\Sigma|n_0, S_0) d\Sigma \quad (6)$$

$$= \int \frac{|K|^{3/2}}{(2\pi)^{3N/2} |\Sigma|^{N/2} |S_{xx}|^{3/2}} \exp\left\{-\frac{1}{2} \text{tr}(\Sigma^{-1} S_{y|x})\right\} \quad (7)$$

$$\frac{|S_0|^{n_0/2} |\Sigma|^{-(4+n_0)/2}}{2^{3n_0/2} \Gamma_3(n_0/2)} \exp\left\{-\frac{1}{2} \text{tr}(\Sigma^{-1} S_0)\right\} d\Sigma \quad (8)$$

$$p(Y|X) = \int \frac{|K|^{3/2} |S_0|^{n_0/2} |\Sigma|^{-(4+n_0)/2}}{(2\pi)^{3N/2} |\Sigma|^{N/2} |S_{xx}|^{3/2} 2^{3n_0/2} \Gamma_3(n_0/2)} \exp\left\{-\frac{1}{2} \text{tr}(\Sigma^{-1} (S_{y|x} + S_0))\right\} d\Sigma \quad (9)$$

$$p(Y|X) = \frac{|K|^{3/2} |S_0|^{n_0/2}}{(2\pi)^{3N/2} |S_{xx}|^{3/2} 2^{3n_0/2} \Gamma_3(n_0/2)} \int |\Sigma|^{-(3+N+n_0+1)/2} \exp\left\{-\frac{1}{2} \text{tr}(\Sigma^{-1} (S_{y|x} + S_0))\right\} \quad (10)$$

$$p(Y|X) = \frac{|K|^{3/2} |S_0|^{n_0/2} 2^{(N+n_0)3/2} \Gamma_3((N+n_0)/2)}{|2\pi|^{3N/2} |S_{xx}|^{3/2} 2^{3n_0/2} \Gamma_3(n_0/2) |S_0 + S_{y|x}|^{(N+n_0)/2}} \int IW(N+n_0, S_{y|x} + S_0) d\Sigma \quad (11)$$

The part likelihood is then given by

$$p(Y|X, K, n_0, S_0) = \frac{|K|^{\frac{3}{2}} |S_0|^{\frac{n_0}{2}} \Gamma_3\left(\frac{N+n_0}{2}\right)}{\pi^{\frac{3N}{2}} |S_{xx}|^{\frac{3}{2}} |S_0 + S_{y|x}|^{\frac{(N+n_0)}{2}} \Gamma_3\left(\frac{n_0}{2}\right)} \quad (12)$$

## References

- [1] E. B. Fox. *Bayesian Nonparametric Learning of Complex Dynamical Phenomena*. PhD thesis, Massachusetts Institute of Technology, Cambridge, MA, 2009.
